# Supplementary material
Source: PubMed Central journal article supplement (PMC5118671)
Supplement: jcav07p2077s1.pdf [file jcav07p2077s1.pdf]

Supplementary table 1:

High-dose chemotherapy protocols:

| <b>Intensification Regimen</b>          | <b>Day 1</b>                                                                       | <b>Day 2</b>                | <b>Day 3</b>                                                             |
|-----------------------------------------|------------------------------------------------------------------------------------|-----------------------------|--------------------------------------------------------------------------|
| Cyclophosphamide/Melphalan              | Cyclophosphamide<br>60mg/kg                                                        | Cyclophosphamide<br>60mg/kg | Melphalan<br>140mg/m <sup>2</sup>                                        |
| Cyclophosphamide/Melphalan/Mitoxantrone | Cyclophosphamide<br>60mg/kg                                                        | Cyclophosphamide<br>60mg/kg | Melphalan<br>140mg/m <sup>2</sup><br>Mitoxantrone<br>60mg/m <sup>2</sup> |
| Epirubicine Cyclophosphamide (x4)       | Epirubicine<br>150 mg/m <sup>2</sup><br>Cyclophosphamide<br>4000 mg/m <sup>2</sup> |                             |                                                                          |
